# Supplementary material for: Regulating the Coordination State of a Heme Protein by a Designed Distal Hydrogen-Bonding Network
Source: PubMed Central journal article supplement — ChemistryOpen. 2014 Dec 1;4(2):97–101. doi: 10.1002/open.201402108 (PMC4420578; doi:10.1002/open.201402108), 2014-12-01
Supplement: open0004-0097-sd1.pdf [file open0004-0097-sd1.pdf]

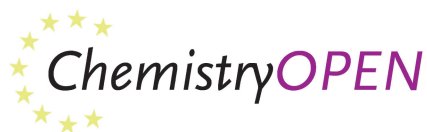

## Supporting Information

© 2015 The Authors. Published by Wiley-VCH Verlag GmbH & Co. KGaA, Weinheim

### **Regulating the Coordination State of a Heme Protein by a Designed Distal Hydrogen-Bonding Network**

Jun-Fang Du,<sup>[a]</sup> Wei Li,<sup>[b]</sup> Lianzhi Li,<sup>[c]</sup> Ge-Bo Wen,<sup>[d]</sup> Ying-Wu Lin,<sup>\*,[a, d]</sup> and Xiangshi Tan<sup>\*,[b]</sup>

open\_201402108\_sm\_miscellaneous\_information.pdf

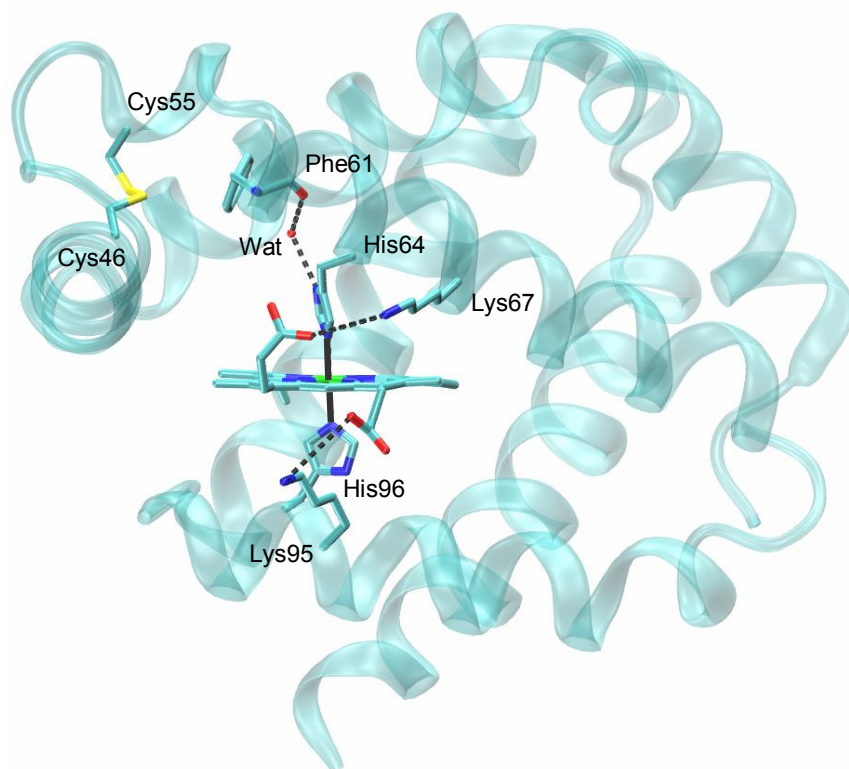

**Fig. S1.** X-ray structure of human NgB (PDB code 4MPM, Guimarães *et al. Acta Cryst.* **2014**, *D70*, 1005-1014), showing the bis-His coordination state and the hydrogen-bonding interactions in the heme active site.

**Table S1.** X-ray crystallography data collection and refinement statistics

|                                                                          | <b>L29E Mb</b>                                                                                   | <b>F43H Mb</b>                                                                                   | <b>L29E/F43H Mb</b>                                                                              |
|--------------------------------------------------------------------------|--------------------------------------------------------------------------------------------------|--------------------------------------------------------------------------------------------------|--------------------------------------------------------------------------------------------------|
| Wavelength                                                               | 0.9792                                                                                           | 0.9792                                                                                           | 0.9792                                                                                           |
| Space group                                                              | <i>P2<sub>1</sub>2<sub>1</sub>2<sub>1</sub></i>                                                  | <i>P2<sub>1</sub>2<sub>1</sub>2<sub>1</sub></i>                                                  | <i>P2<sub>1</sub>2<sub>1</sub>2<sub>1</sub></i>                                                  |
| Unit-cell dimensions (Å, °)                                              | <i>a</i> = 39.866,<br><i>b</i> = 48.640,<br><i>c</i> = 78.694;<br>$\alpha = \beta = \gamma = 90$ | <i>a</i> = 39.808,<br><i>b</i> = 48.055,<br><i>c</i> = 77.210;<br>$\alpha = \beta = \gamma = 90$ | <i>a</i> = 33.968,<br><i>b</i> = 60.898,<br><i>c</i> = 75.356;<br>$\alpha = \beta = \gamma = 90$ |
| Resolution (Å)                                                           | 1.45                                                                                             | 1.50                                                                                             | 1.95                                                                                             |
| No. of observations                                                      | 205235                                                                                           | 207454                                                                                           | 69709                                                                                            |
| No. of unique reflections <sup>[a]</sup>                                 | 27782(1397)                                                                                      | 23101(1125)                                                                                      | 12082 (615)                                                                                      |
| Completeness (%)                                                         | 99.7(99.9)                                                                                       | 95.3(94.9)                                                                                       | 100.0 (100.0)                                                                                    |
| <I>/ (I)                                                                 | 23.7(6.8)                                                                                        | 32.1(5.9)                                                                                        | 18.5 (5.8)                                                                                       |
| Redundancy                                                               | 7.4(7.5)                                                                                         | 9.0(9.3)                                                                                         | 5.8 (5.8)                                                                                        |
| $R_{\text{sym}}$ <sup>[b]</sup>                                          | 0.089(0.441)                                                                                     | 0.063(0.484)                                                                                     | 0.100 (0.447)                                                                                    |
| $R_{\text{cryst}}$ <sup>[c]</sup> / $R_{\text{free}}$ <sup>[d]</sup> (%) | 0.1839/0.2069                                                                                    | 0.1811/0.2087                                                                                    | 0.1817/0.2188                                                                                    |
| RMSD bonds (Å)/angles (°)                                                | 0.006/1.015                                                                                      | 0.007/1.173                                                                                      | 0.009/1.169                                                                                      |
| Ramachandran plot, residues in:                                          |                                                                                                  |                                                                                                  |                                                                                                  |
| Most favored regions (%)                                                 | 98                                                                                               | 98                                                                                               | 98.4                                                                                             |
| Additional allowed regions (%)                                           | 1.6                                                                                              | 1.6                                                                                              | 1.6                                                                                              |
| Generously allowed regions (%)                                           | 0.4                                                                                              | 0.4                                                                                              | 0.0                                                                                              |
| Disallowed regions (%)                                                   | 0.0                                                                                              | 0.0                                                                                              | 0.0                                                                                              |
| PDB code                                                                 | 4PQ6                                                                                             | 4PQC                                                                                             | 4PQB                                                                                             |

[a] Numbers in parentheses represent values in the highest resolution shell (Å).

[b]  $R_{\text{sym}} = \sum |I_j - \langle I \rangle| / \sum I_j$ , where  $I_j$  is the observed integrated intensity,  $\langle I \rangle$  is the average integrated intensity obtained from multiple measurements, and the summation is over all observed reflections.

[c]  $R_{\text{cryst}} = \sum ||F_{\text{obs}}| - |F_{\text{calc}}|| / \sum |F_{\text{obs}}|$ ,  $F_{\text{obs}}$  and  $F_{\text{calc}}$  are observed and calculated structure factor amplitudes, respectively.

[d]  $R_{\text{free}}$  calculated with randomly selected reflections (5%).
